# Supplementary material for: Complement C3 Reduces Apoptosis via Interaction with the Intrinsic Apoptotic Pathway
Source: MDPI journal article supplement (doi:10.3390/cells12182282), 2023-09-15
Supplement: s1 [file s1]

Supplementary Table S1. Comparative Proteomics Analyses of proteins in C3-binding complex

| Primary Protein Name | Protein Description                                                                                                                                                                                                                                                                      | P-value (Ratio Data) | ANOVA P-value | Ratio (WT/KO) | # Peptides |
|----------------------|------------------------------------------------------------------------------------------------------------------------------------------------------------------------------------------------------------------------------------------------------------------------------------------|----------------------|---------------|---------------|------------|
| B2RQ1_MOUSE          | MCG133649, isoform CRA_a GN=Myh6; cardiac muscle, alpha; alpha-MHC                                                                                                                                                                                                                       | 0.01                 | 0.03          | 2.2           | 125        |
| CO3_MOUSE            | Complement C3, Alternative initiation; Cleavage on pair of basic residues; Complement alternate pathway; Complement pathway; Direct protein sequencing; Disulfide bond; Glycoprotein; Immunity; Inflammatory response; Innate immunity; Phosphoprotein; Secreted; Signal; Thioester bond | 1.8E-07              | 2.8E-03       | 2.3           | 47         |
| Q497E4_MOUSE         | Actin alpha cardiac GN=Actc1                                                                                                                                                                                                                                                             | 2.4E-20              | 1.9E-04       | 2.2           | 36         |
| MYL3_MOUSE           | Myosin light chain 3 GN=Myl3                                                                                                                                                                                                                                                             | 1.2E-09              | 4.3E-04       | 2.7           | 32         |
| ALBU_MOUSE           | Serum albumin GN=Alb                                                                                                                                                                                                                                                                     | 4.2E-07              | 6.9E-03       | 2.4           | 24         |
| Q545Y3_MOUSE         | Tropomyosin 1, alpha, isoform CRA_1 GN=Tpm1                                                                                                                                                                                                                                              | 6.2E-03              | 5.6E-03       | 18.5          | 22         |
| ACTN2_MOUSE          | Alpha-actinin-2 GN=Actn2                                                                                                                                                                                                                                                                 | 3.9E-03              | 0.05          | 2.1           | 21         |
| B1AR69_MOUSE         | Myosin, heavy polypeptide 13, skeletal muscle GN=Myh13                                                                                                                                                                                                                                   | 2.0E-06              | 0.04          | 2.7           | 19         |
| MYH3_MOUSE           | Myosin-3 GN=Myh3                                                                                                                                                                                                                                                                         | 4.3E-03              | 0.08          | 2.3           | 19         |
| MYH7B_MOUSE          | Myosin-7B GN=Myh7b                                                                                                                                                                                                                                                                       | 4.4E-10              | 6.4E-04       | 2.6           | 13         |
| LDB3_MOUSE           | Isoform Oracle 2 of LIM domain-binding protein 3 GN=Ldb3                                                                                                                                                                                                                                 | 5.2E-32              | 0.02          | 2.0           | 11         |
| CYC_MOUSE            | Cytochrome c, somatic GN=Cycc                                                                                                                                                                                                                                                            | 2.6E-12              | 1.7E-04       | 2.8           | 10         |
| Q5SX41_MOUSE         | Myosin, heavy polypeptide 2, skeletal muscle, adult GN=Myh2                                                                                                                                                                                                                              | 2.1E-03              | 5.2E-04       | 5.8           | 8          |
| E9PZF0_MOUSE         | Nucleoside diphosphate kinase GN=Nme2                                                                                                                                                                                                                                                    | 0                    | 0.30          | 2.6           | 8          |
| Q3UVB1_MOUSE         | Myoglobin, isoform CRA_a GN=Mb                                                                                                                                                                                                                                                           | 1.2E-06              | 8.5E-03       | 2.0           | 7          |
| NDUS6_MOUSE          | NADH dehydrogenase [ubiquinone] iron-sulfur protein 6, mitochondrial GN=Ndufs6                                                                                                                                                                                                           | 3.9E-03              | 0.18          | 2.0           | 7          |
| ECH1_MOUSE           | Delta(3,5)-Delta(2,4)-dienoyl-CoA isomerase, mitochondrial GN=Ech1                                                                                                                                                                                                                       | 9.8E-22              | 4.7E-03       | 3.2           | 6          |
| NDUAA_MOUSE          | NADH dehydrogenase [ubiquinone] 1 alpha subcomplex subunit 10, mitochondrial GN=Ndufa10                                                                                                                                                                                                  | 5.3E-31              | 0.04          | 4.1           | 5          |
| B1ATS4_MOUSE         | ATPase, Ca <sup>++</sup> transporting, ubiquitous GN=Atp2a3                                                                                                                                                                                                                              | 1.3E-35              | 1.4E-06       | 3.2           | 5          |
| K2C75_MOUSE          | Keratin, type II cytoskeletal 75 GN=Krt75                                                                                                                                                                                                                                                | 4.2E-33              | 8.0E-07       | 8.7           | 4          |
| B1ASG5_MOUSE         | Ubiquinol-cytochrome c reductase hinge protein GN=Uqcrrh                                                                                                                                                                                                                                 | 1.5E-10              | 7.1E-07       | 7.7           | 4          |
| Q497F1_MOUSE         | Troponin I, cardiac 3 GN=Tnni3                                                                                                                                                                                                                                                           | 9.8E-05              | 5.9E-04       | 4.4           | 4          |
| E9PYX4_MOUSE         | Glyceraldehyde-3-phosphate dehydrogenase                                                                                                                                                                                                                                                 | 4.1E-08              | 2.8E-03       | 3.6           | 4          |
| K2C1_MOUSE           | Keratin, type II cytoskeletal 1 GN=Krt1                                                                                                                                                                                                                                                  | 5.3E-08              | 3.6E-04       | 3.3           | 4          |
| K22O_MOUSE           | Keratin, type II cytoskeletal 2 oral GN=Krt76                                                                                                                                                                                                                                            | 2.1E-03              | 0.07          | 3.0           | 4          |
| TBA4A_MOUSE          | Tubulin alpha-4A chain GN=Tuba4a                                                                                                                                                                                                                                                         | 1.9E-11              | 3.8E-03       | 2.5           | 4          |
| E9Q264_MOUSE         | Uncharacterized protein GN=Myh15                                                                                                                                                                                                                                                         | 0.10                 | 0.44          | 2.1           | 4          |
| SODC_MOUSE           | Superoxide dismutase [Cu-Zn] GN=Sod1                                                                                                                                                                                                                                                     | 1.4E-05              | 2.8E-04       | 4.7           | 3          |
| E9QPE7_MOUSE         | Uncharacterized protein GN=Myh11                                                                                                                                                                                                                                                         | 0.08                 | 0.82          | 3.6           | 3          |

|              |                                                                                                                                                                                                                          |         |         |     |   |
|--------------|--------------------------------------------------------------------------------------------------------------------------------------------------------------------------------------------------------------------------|---------|---------|-----|---|
| Q3UH59 MOUSE | Myosin, heavy polypeptide 10, non-muscle<br>GN=Myh10                                                                                                                                                                     | 0.06    | 0.37    | 3.5 | 3 |
| ANR53 MOUSE  | Ankyrin repeat domain-containing protein<br>53                                                                                                                                                                           | 4.3E-06 | 0.01    | 3.2 | 3 |
| A2A6Q8 MOUSE | Myosin, light polypeptide 4 (Fragment)<br>GN=Myl4                                                                                                                                                                        | 4.2E-12 | 0.17    | 3.1 | 3 |
| Q543D7 MOUSE | Four and a half LIM domains 2, isoform<br>CRA a GN=Fhl2                                                                                                                                                                  | 4.6E-03 | 0.04    | 2.8 | 3 |
| Q6GT24 MOUSE | Peroxiredoxin 6 GN=Prdx6                                                                                                                                                                                                 | 5.7E-10 | 4.8E-03 | 2.5 | 3 |
| K6PL MOUSE   | 6-phosphofructokinase, liver type GN=Pfkl                                                                                                                                                                                | 1.9E-06 | 0.01    | 2.4 | 3 |
| E9Q607 MOUSE | Uncharacterized protein GN=Actg1                                                                                                                                                                                         | 3.3E-04 | 0.23    | 2.3 | 3 |
| H4 MOUSE     | Histone H4 GN=Hist1h4a                                                                                                                                                                                                   | 4.2E-07 | 4.5E-03 | 2.2 | 3 |
| B2RTK3 MOUSE | Histone H2B GN=Hist1h2bm                                                                                                                                                                                                 | 8.2E-06 | 0.04    | 2.2 | 3 |
| PLIN4 MOUSE  | Perilipin-4 GN=Plin4                                                                                                                                                                                                     | 2.0E-08 | 8.7E-05 | 2.0 | 3 |
| K6PF MOUSE   | 6-phosphofructokinase, muscle type<br>GN=Pfkm                                                                                                                                                                            | 4.9E-04 | 1.6E-03 | 9.5 | 2 |
| B2RXX9 MOUSE | Myosin, heavy polypeptide 7, cardiac<br>muscle, beta GN=Myh7                                                                                                                                                             | 1.4E-15 | 2.6E-03 | 8.2 | 2 |
| E9QLL7 MOUSE | Uncharacterized protein GN=Itga7                                                                                                                                                                                         | 3.8E-09 | 7.9E-05 | 7.9 | 2 |
| Q546G4 MOUSE | Albumin 1 GN=Alb                                                                                                                                                                                                         | 2.5E-06 | 1.1E-04 | 7.7 | 2 |
| RT36 MOUSE   | 28S ribosomal protein S36, mitochondrial<br>GN=Mrps36                                                                                                                                                                    | 1.7E-08 | 1.0E-04 | 7.1 | 2 |
| F8WIG3 MOUSE | Uncharacterized protein GN=Ninl                                                                                                                                                                                          | 3.3E-05 | 6.0E-03 | 6.6 | 2 |
| B2RRX1 MOUSE | Actin, beta GN=Actb                                                                                                                                                                                                      | 1.0E-05 | 4.1E-03 | 6.6 | 2 |
| LDHC MOUSE   | L-lactate dehydrogenase C chain GN=Ldhc                                                                                                                                                                                  | 5.8E-12 | 1.1E-04 | 4.6 | 2 |
| NDUA7 MOUSE  | NADH dehydrogenase [ubiquinone] 1<br>alpha subcomplex subunit 7 GN=Ndufa7                                                                                                                                                | 1.7E-24 | 3.4E-05 | 4.5 | 2 |
| E9QAS7 MOUSE | Uncharacterized protein GN=Inpp5a                                                                                                                                                                                        | 5.6E-03 | 0.24    | 4.2 | 2 |
| A1AT5 MOUSE  | Alpha-1-antitrypsin 1-5 GN=Serpina1e                                                                                                                                                                                     | 0.27    | 0.78    | 3.5 | 2 |
| IGH1M MOUSE  | Ig gamma-1 chain C region, membrane-<br>bound form GN=Ighg1                                                                                                                                                              | 5.4E-18 | 0.04    | 3.4 | 2 |
| D3Z0Z9 MOUSE | Glyceraldehyde-3-phosphate<br>dehydrogenase GN=Gm5069                                                                                                                                                                    | 2.4E-30 | 4.9E-04 | 3.3 | 2 |
| QCR7 MOUSE   | Cytochrome b-c1 complex subunit 7<br>GN=Uqcrb                                                                                                                                                                            | 8.5E-15 | 8.5E-05 | 3.1 | 2 |
| A2AIR5 MOUSE | Glutamate receptor ionotropic, NMDA3A<br>GN=Grin3a                                                                                                                                                                       | 2.3E-05 | 1.9E-03 | 3.0 | 2 |
| A2AEW8 MOUSE | GRIP1 associated protein 1 GN=Gripap1<br>(neuron-specific guanine nucleotide<br>exchange factor for the Ras family of small<br>G proteins (RasGEF) and is associated with<br>the GRIP/AMPA receptor complex in<br>brain) | 3.2E-25 | 6.4E-04 | 2.9 | 2 |
| E9Q1N7 MOUSE | Uncharacterized protein                                                                                                                                                                                                  | 0.01    | 0.13    | 2.7 | 2 |
| COG6 MOUSE   | Conserved oligomeric Golgi complex<br>subunit 6 GN=Cog6                                                                                                                                                                  | 3.2E-03 | 9.2E-03 | 2.7 | 2 |
| E9Q452 MOUSE | Uncharacterized protein GN=Tpm1                                                                                                                                                                                          | 2.6E-03 | 0.01    | 2.2 | 2 |
| B1AXW5 MOUSE | Peroxiredoxin 1 (Fragment) GN=Prdx1                                                                                                                                                                                      | 1.2E-06 | 0.03    | 2.2 | 2 |

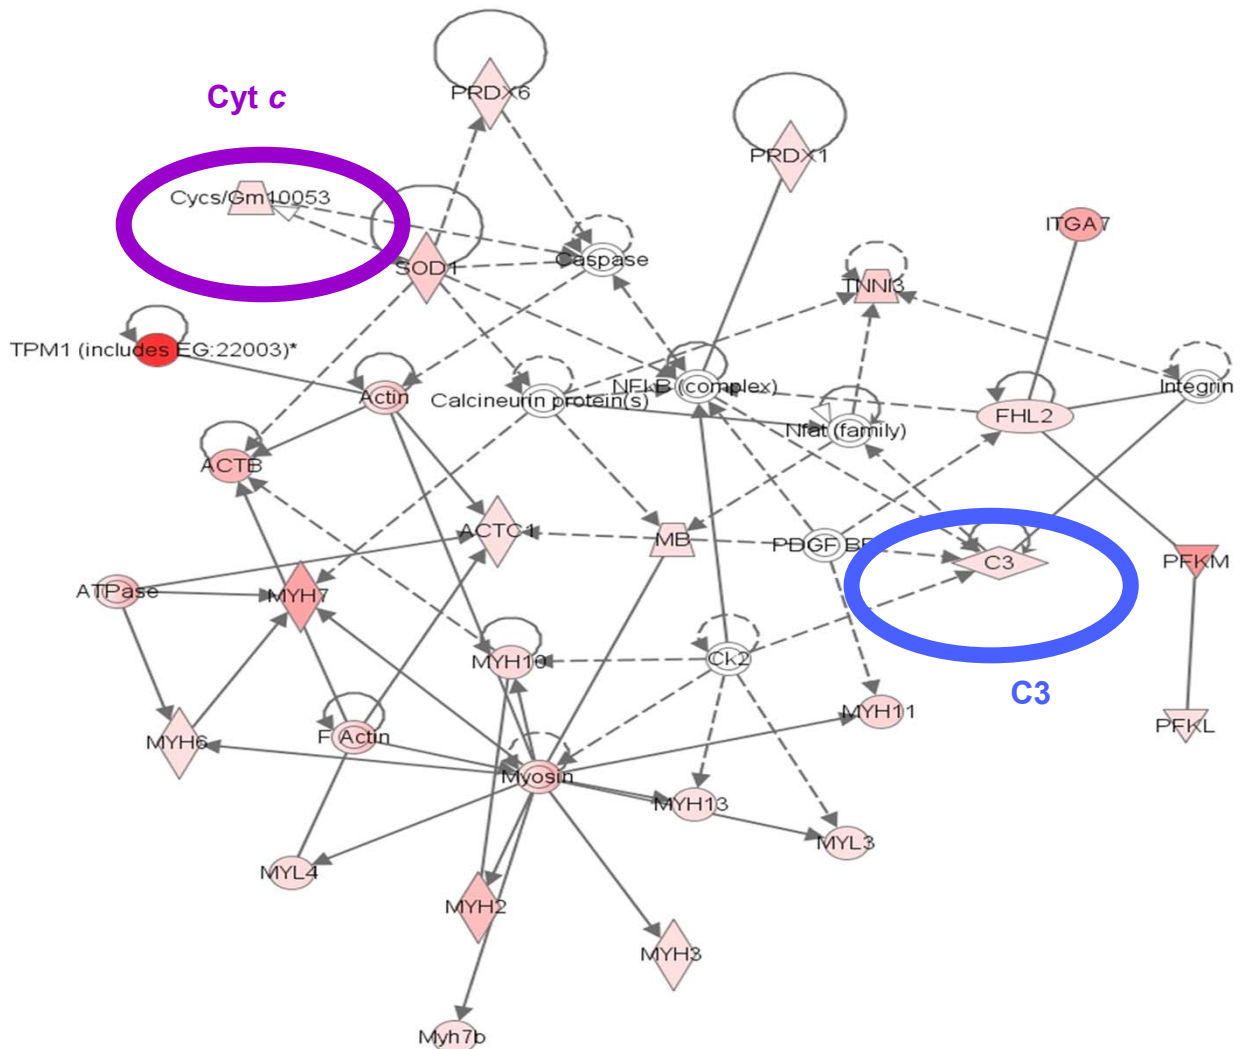

**Supplementary Figure S1. Pathway analysis of protein networks associated with the C3.** The network was generated by Ingenuity pathway analysis (IPA) software using the list of differentially expressed 57 proteins identified by proteomics. The yellow circle on the left highlights cytochrome *c*, that on the right highlights C3.

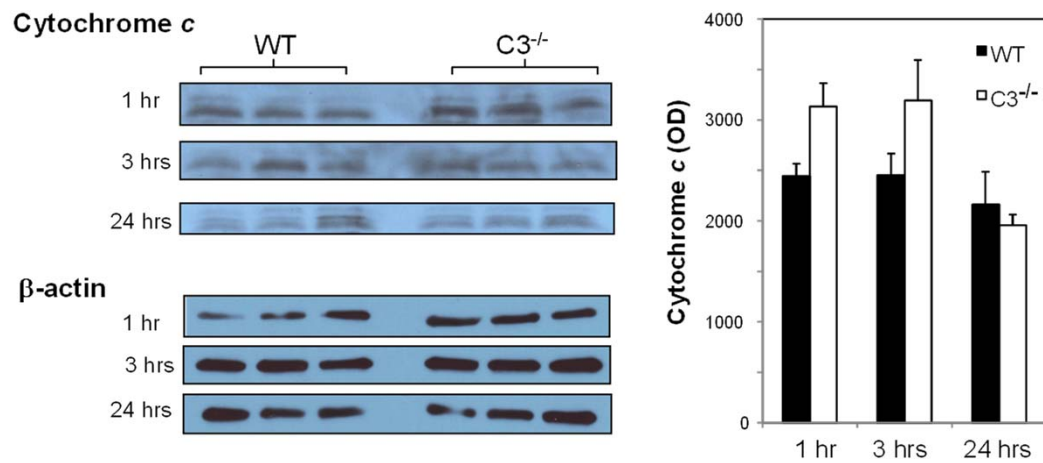

**Supplementary Figure S2. Cytochrome *c* levels in C3<sup>-/-</sup> and WT myocardial cytosols after I/R.** Cytosolic fractions were isolated and the proteins separated by SDS-PAGE. Western blotting was carried out using an anti-cytochrome *c* Ab and ECL detection.  $\beta$ -actin, detected with an anti- $\beta$ -actin Ab, acted as a control for cytosol volume added/well. The left panels are blots of cytochrome *c* and  $\beta$ -actin. Each lane represents an individual mouse. The right chart shows the results of densitometric analysis of the cytochrome *c* bands averaged for the 3 mice.  $P > 0.05$  for C3<sup>-/-</sup> and WT mice results.

## Proposed experiments in a cell free apoptosis system

| Hypotheses                                     | Pre-incubate C3<br>with Cyt <i>c</i> | Pre-incubate C3<br>with cytosol |
|------------------------------------------------|--------------------------------------|---------------------------------|
| C3 binds Cyt <i>c</i>                          | No apoptosis                         | Apoptosis                       |
| C3 binds factors downstream<br>of Cyt <i>c</i> | Apoptosis                            | No apoptosis                    |

**Supplementary Figure S3. Schematic diagram depicting the hypothesis and model of the possibilities/results for C3 interaction with factor(s) in the intrinsic apoptotic pathway.**

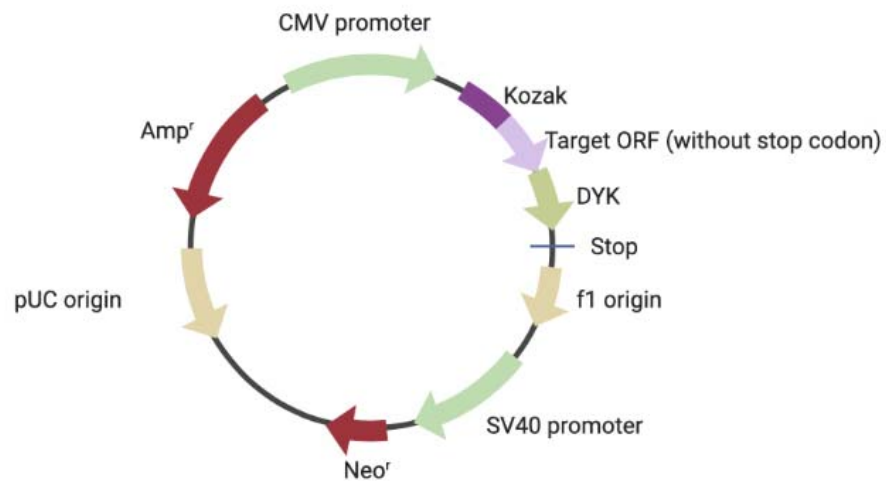

**Supplementary Figure S4. pcDNA3.1<sup>+</sup>/C-(K)DYK vector map.** The full-length human C3 expressing clones are constructed using the pcDNA3.1<sup>+</sup>/C-(K)DYK vector. Target ORF, which is full-length C3 in this study, is cloned into pcDNA3.1<sup>+</sup>/C-(K)DYK vector without introducing any extra nucleotides before or after target ORF. ORFs cloned in pcDNA3.1<sup>+</sup>/C-(K)DYK vector were expressed in mammalian cells as a tagged protein with a C-terminal FLAG tag. Proteins expressed from this clone were detected and purified following transgene expression using anti-FLAG antibodies.
